# Supplementary material
Source: publisher site journal article supplement (https://www.dovepress.com/article/512880)
Supplement: Supplementary file 1 [file get_supplementary_file.php]

**
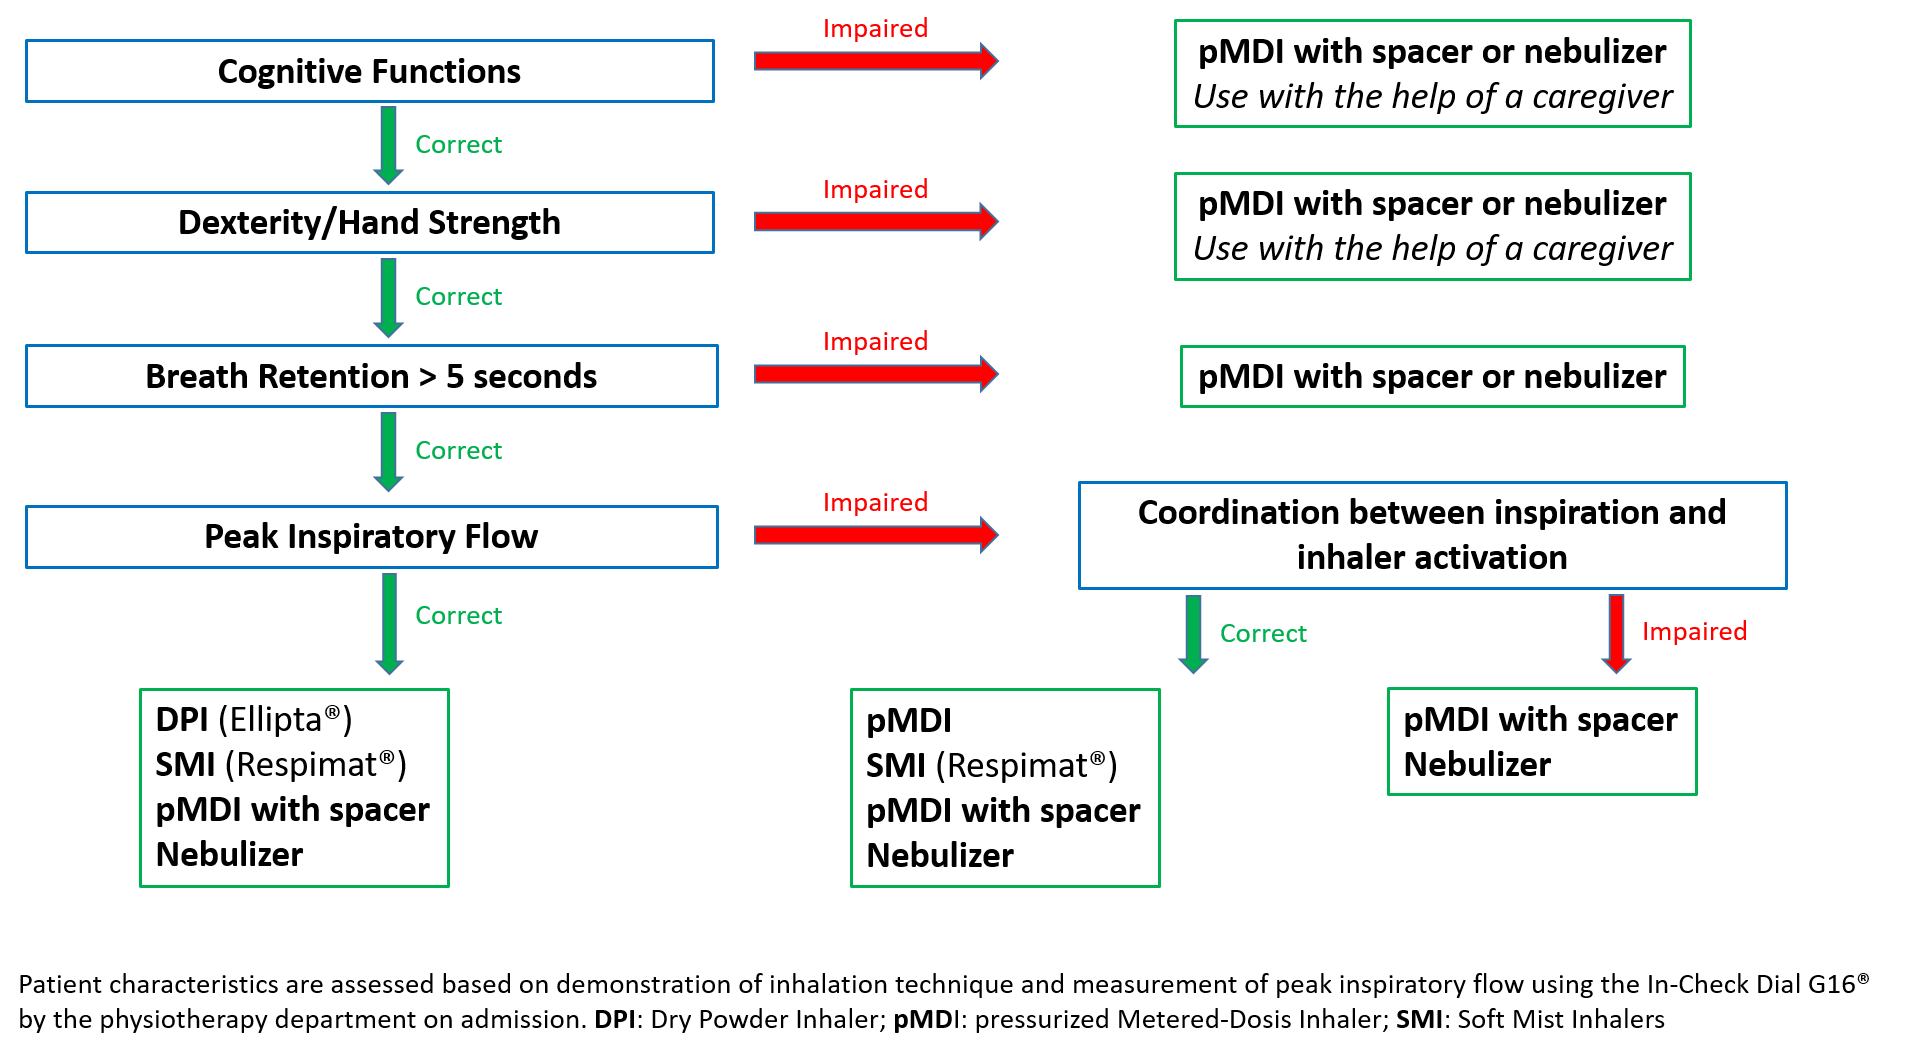
**


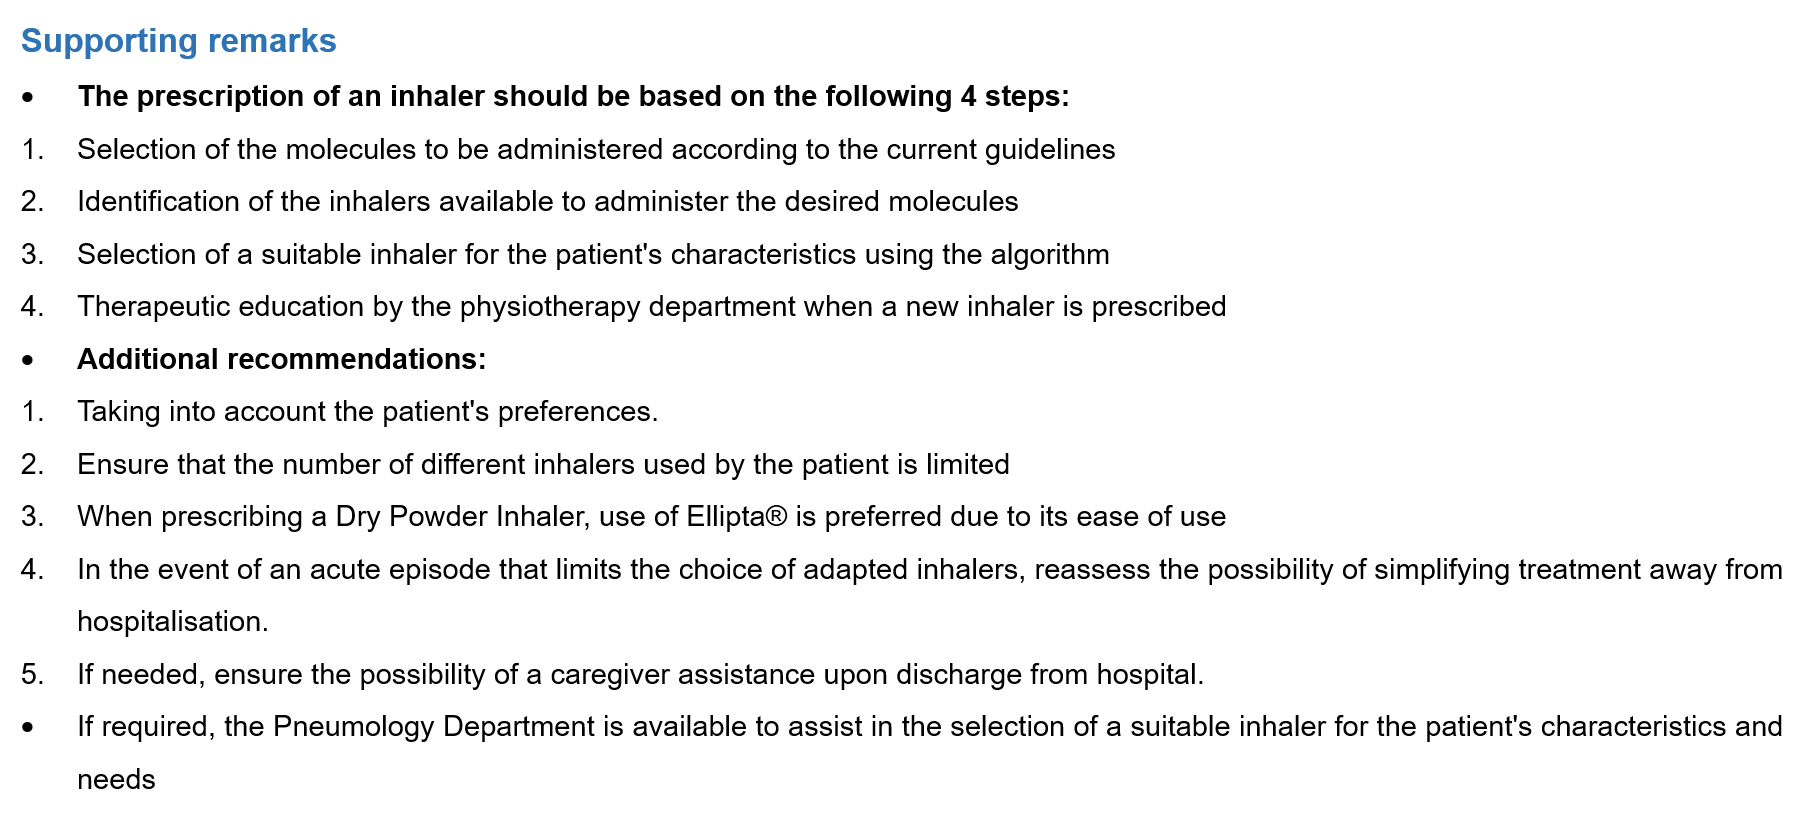


**Figure S1.** Written guide to assist in the selection of an adapted inhaler according to patient characteristics.

**
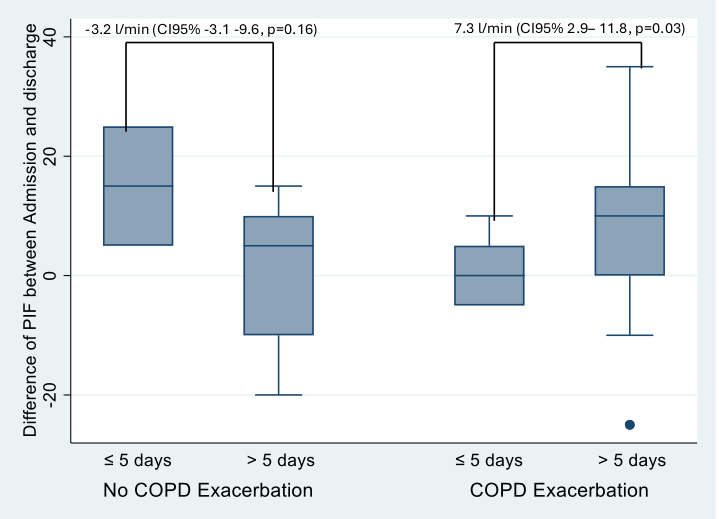
**

**Figure S2.** Evolution of PIF in patients with AECOPD and without AECOPD, analyses of stays longer or shorter than 5 days

AECOPD: acute exacerbation of chronic obstructive pulmonary disease, CI: confidence interval, COPD: chronic obstructive pulmonary disease, PIF: peak inspiratory flow


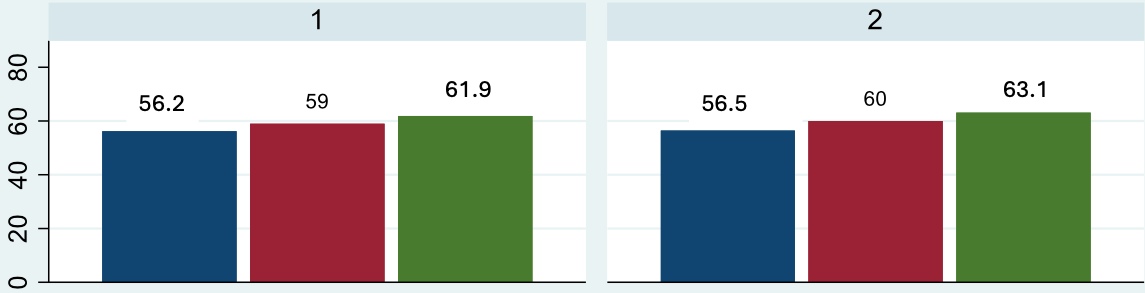


**Figure S3a.** Evolution of intra-assessment PIF based on median age at admission

1 = measurement at admission in group older than medium age

2 = measurement at admission in group younger than medium age

PIF = peak inspiratory flow


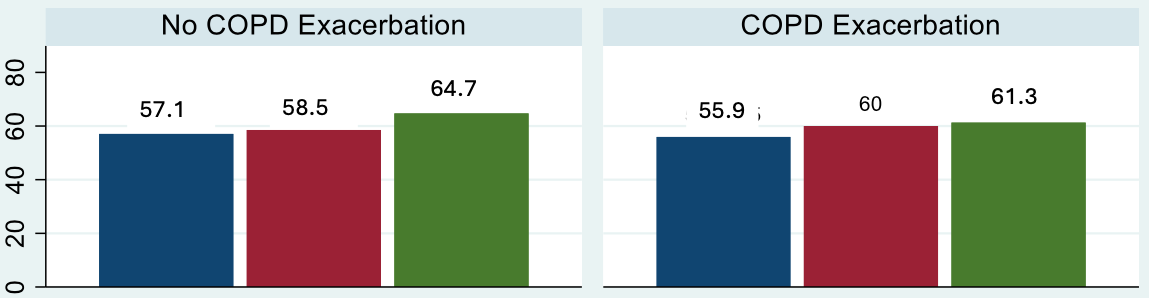


**Figure S3b.** Evolution of intra-assessment PIF based on presence or not of AECOPD at admission

AECOPD = acute exacerbation of chronic obstructive pulmonary disease, COPD : chronic obstructive pulmonary disease, PFI= peak inspiratory flow


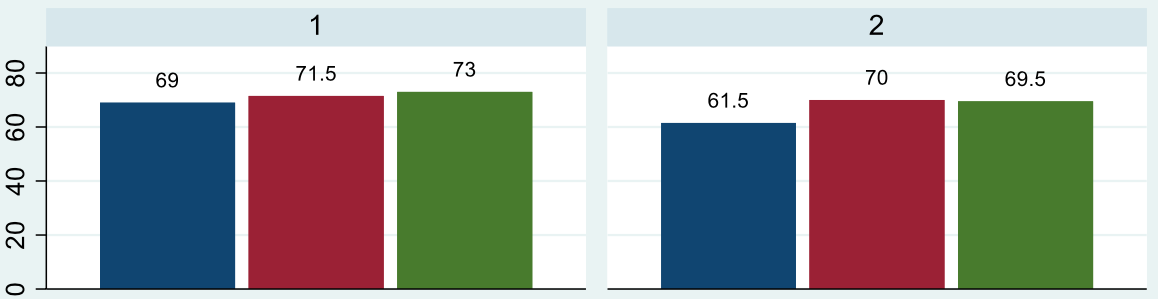


**Figure S3c.** Evolution of intra-assessment PIF based on median age at discharge

1 = measurement at discharge in group younger than medium age

2 = measurement at admission in group older than medium age

PIF = peak inspiratory flow


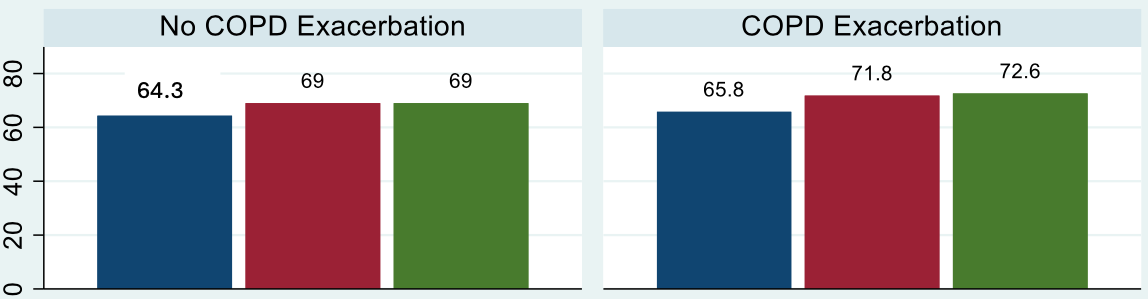


**Figure S3d.** Evolution of intra-assessment PIF based on presence or not of AECOPD at discharge

AECOPD = acute exacerbation of chronic obstructive pulmonary disease, COPD : chronic obstructive pulmonary disease, PFI= peak inspiratory flow


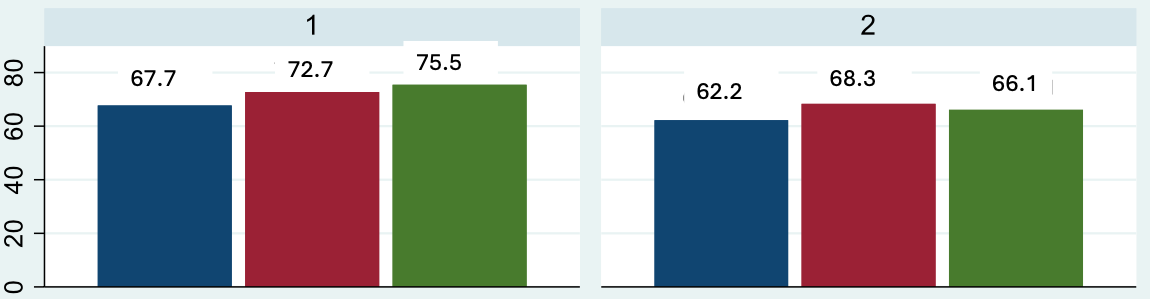


**Figure S3e.** Evolution of intra-assessment PIF based on median length of hospital stay at discharge

1 = measurement at discharge in group with shorter than median LHS

2 = measurement at discharge in group with longer than median LHS

LHS = length of hospital stay, PIF = peak inspiratory flow
